# Supplementary material
Source: PubMed Central journal article supplement (PMC6233982)
Supplement: NIHMS895848-supplement.pdf [file NIHMS895848-supplement.pdf]

## Supplementary Information

### MicroRNA-211 regulates oxidative phosphorylation and energy metabolism in human vitiligo

Anupama Sahoo<sup>1</sup>, Bongyong Lee<sup>1</sup>, Katia Boniface<sup>2</sup>, Julien Seneschal<sup>2</sup>, Sanjaya K. Sahoo<sup>1</sup>, Tatsuya Seki<sup>1,3</sup>, Chunyan Wang<sup>1</sup>, Soumen Das<sup>4</sup>, Xianlin Han<sup>1</sup>, Michael Steppie<sup>5</sup>, Sudipta Seal<sup>4</sup>, Alain Taieb<sup>2</sup> and Ranjan J. Perera<sup>1\*</sup>

#### MATERIALS AND METHODS

##### Cell lines and tissue culture conditions

Cell lines were primary human epidermal melanocyte-light (HEM-1) (Catalogue # 2200; ScienCell, Carlsbad, CA) cells, the immortalized melanocyte cell line PIG1, and the immortalized line PIG3V derived from the peri-lesional skin of patient with vitiligo. PIG1 and PIG3V cell lines were a kind gift from Dr. Caroline Le Poole, Loyola University, Chicago (IL). HEM-1 cells were maintained as described previously (Mazar *et al.*, 2010), and PIG1 and PIG3V cells were grown in Medium 254 (Catalogue #M254500, Life Technologies, Carlsbad, CA) containing HMGS (Catalogue #S0025, Life Technologies) with penicillin and streptomycin.

##### RNA isolation, cDNA synthesis, and quantitative real-time PCR

Total RNA was isolated from cells using the miRNeasy Mini Kit (Catalogue #217004, Qiagen, Hilden, Germany) with subsequent quantification and integrity analysis using a 2100 Bioanalyzer as described previously (Mazar *et al.*, 2016). Taqman probes were used to quantify hsa-miR-211 using RNU48 primer probes as controls. SYBR green primers were used for the genes listed in Table S5. The Ct values for all genes tested were normalized by the expression of reference gene hypoxanthine phosphoribosyltransferase 1 (*HPRT*) unless mentioned otherwise. For patient samples, to isolate total RNA from formalin-fixed paraffin-embedded (FFPE) blocks, eight 20uM sections were collected and RNA was isolated using the miRNA FFPE kit (Catalogue #217504, Qiagen, Hilden, Germany) according to the manufacturer's instructions.

##### Western blot analysis and melanin content quantification

Equal number of cells were harvested, lysates prepared, and proteins extracted using Radioimmunoprecipitation assay (RIPA) lysis buffer (50 mM Tris pH 7.4; 150 mM NaCl; 1% Triton X-100; 1% sodium deoxycholate; SDS) containing protease inhibitor cocktail and PMSF. The Pierce BCA Protein Assay kit (Thermo Fisher Scientific, Waltham, MA) was used to quantify total protein. Equal amounts of protein were loaded on to 10% SDS polyacrylamide gels and the proteins transferred to nitrocellulose membranes (Whatman International, Maidstone, UK) and incubated with PGC1- $\alpha$  (Catalogue #ST1202, EMD Millipore, Massachusetts, USA), Mitoprofile (Catalogue #ab110413, MitoSciences, Abcam, Cambridge, UK), or Glyceraldehyde-3-Phosphate Dehydrogenase (GAPDH) (Catalogue #sc-25778, Santa Cruz Biotechnology, Inc., Texas, USA) overnight at 4°C followed by incubation

with appropriate secondary antibodies at room temperature for 1 h. Protein bands were detected by chemiluminescence for visualization. GAPDH was used as a loading control. For melanin content, equal numbers of each cell line were pelleted and resuspended in RIPA lysis buffer as above. 30 minutes post lysis, lysates were centrifuged at 13000 g for 15 min, and the resulting pigment pellet was resuspended in NaOH (1 M, in 10% DMSO) solution and incubated at 100 deg C for 30 minutes. The resulting supernatant was used for measurement of melanin at 405 nm in a microplate scanning spectrophotometer (BioTek Instruments, Inc., VT, USA).

### **Oxygen consumption rate (OCR) and extracellular acidification rate (ECAR)**

OCR and ECAR were measured as described previously (Mazar *et al.*, 2016), using the XF Extracellular Flux Analyzer (Seahorse Bioscience, Agilent, Santa Clara, CA) and Seahorse XF Cell Mito Stress Test Kit (Catalogue # 103015-100; Seahorse Bioscience, Agilent, Santa Clara, CA) with minor modifications to the manufacturer's protocols. In brief, 40,000 cells were plated per well in an XF96 cell culture microplate with ten wells used per condition. Final concentrations of reagents were: oligomycin 2  $\mu$ M, trifluorocarbonyl cyanide phenylhydrazine (FCCP) 1  $\mu$ M, and rotenone-antimycin A 1  $\mu$ M. The experimental protocol was: loop (3 times), mix (3 min), measure (4 min), loop end, inject port A (for oligomycin); loop (3 times), mix (3 min), measure (4 min), loop end, inject port B (for FCCP); loop (3 times), mix (3 min), measure (4 min), loop end, inject port C (for rotenone-antimycin A); loop (3 times), mix (3 min), measure (4 min), loop end. OCR and ECAR data were analyzed and plotted based upon the averages and standard deviations of all measurements. Each sample was measured in 10 wells per treatment. The assay was performed in triplicate.

### **Quantification of mitochondrial and genomic DNA content and ROS assay**

Equal numbers of each cell line were pelleted and total genomic DNA (nuclear and mitochondrial) was extracted according to the manufacturer's protocol (Quick-gDNA miniprep kit (Catalogue #11-317AC, Zymo Research, Irvine, CA). DNA yields were measured using a NanoDrop spectrophotometer (260/280 nm and 260/230 nm). qRT-PCR was performed using 100 ng of total genomic DNA from all cells using the following primer sets: mtCO1 forward TGGAGCCTCCGTAGACCTAA and reverse TGCGAAGCCTGGTAGGATAA; human 16sRNA forward GCCTTCCCCCGTAAATGATA and reverse TTATGCGATTACCGGGCTCT; human  $\beta$ -globulin forward ACACAAGTGTGTTCACTAGC and reverse CAACTTCATCCACGTTTACC. Results are presented relative to nuclear  $\beta$ -globulin labels, which were similar in all cell lines. Intracellular ROS levels were measured in 40,000 cells using the OxiSelect™ Intracellular ROS Assay Kit (Green Fluorescence) (Cell Biolabs Inc., San Diego, CA; Catalogue # STA-342-T).

### **Luciferase reporter assays**

The 3'UTR of human PGC1- $\alpha$  containing one miR211 binding site was cloned into the pcDNA6/Luc/NP vector downstream of the luciferase gene (PGC1- $\alpha$ -3'UTR vector). The PGC1- $\alpha$  UTR was also cloned without the miR211 binding site (PGC1- $\alpha$ -3'UTR-miR211-del). Cloning was performed using the Infusion Cloning kit (Clontech, Mountain View, CA). Primers used were: PGC1- $\alpha$ -3'UTR-F 5'TCCCTAGCTGAGGATGAC3'; PGC1- $\alpha$ -3'UTR-R 5'TAATAAGCGAGTAATGGGTAC3'. PIG3V cells were seeded on a 24-well plate at 50,000 cells/well with 600 ng of either PGC1- $\alpha$ -3'UTR or PGC1- $\alpha$ -3'UTR-miR211-del

vector along with 50 ng pRL-TK (Promega, Madison, WI) expressing Renilla luciferase using Lipofectamine 2000 (Invitrogen). Luciferase activity was measured 48 h post transfection using the Dual-Luciferase reporter assay system (Promega). Firefly luciferase activity was normalized to corresponding Renilla luciferase activity. All transfections were performed in triplicate and normalized with co-transfected Renilla luciferase plasmids.

### **Cerium oxide nanoparticles**

Cerium oxide nanoparticles (CNPs) were prepared using 99.999% pure cerium (III) nitrate hexahydrate as a precursor, maintaining a sterile environment (Das *et al.*, 2012). Briefly,  $\text{Ce}(\text{NO}_3)_3 \cdot 6\text{H}_2\text{O}$  was dissolved in DNase- and RNase-free distilled water and an excess amount of 30%  $\text{H}_2\text{O}_2$  was added as an oxidizer. The solution was kept at pH <4 to maintain stability in aqueous solution. CNPs were then thoroughly characterized for the physiological properties including size, surface charge/zeta potential, and surface  $\text{Ce}^{3+}/\text{Ce}^{4+}$  ratio. These well-characterized CNPs were then used for miR-211 loading. The mature miR-211 (sequence 5'-rUrUrCrCrUrUrUrGrUrCrArUrCrCrUrUrUrGrCrCrU-3', (Mazar *et al.*, 2016) with 3' amine functionalization was purchased from Integrated DNA Technologies (Coralville, IO). Briefly, CNPs were first suspended in DMSO (molecular biology grade), and a 10 times molar excess of 1,1'-carbonyldiimidazole (CDI) was added to the CNPs. The resulting solution was rocked for 1 h to activate the hydroxyl group on the surface of the CNPs. Then, miR-211 was added to the activated CNPs and 10 mM borate buffer (pH 8) added to maintain the pH at ~8 (DMSO <10%) and incubated with rocking for 3 h for conjugation. After conjugation, CNP-miR-211s were dialyzed against DNase- and RNase-free water with three water changes every six hours. The dialyzed CNP-miR-211s were then aliquoted and stored at -20°C until use. CNP-miR-211s were characterized by dynamic light scattering and UV-vis spectroscopy.

### **RNA sequencing**

RNA sequencing was performed at the Genomics Core at the Sanford Burnham Prebys. Briefly, total RNA quality was assessed with the Agilent Bioanalyzer Nano (Agilent Technologies). 1 µg of total RNA was used as starting material to construct RNA-seq libraries using the Illumina TruSeq Stranded Total RNA Library preparation kit as per the instructions. First, total RNA was ribo depleted to remove rRNA from total RNA. The remaining non-rRNA was fragmented using divalent cations at elevated temperature. Following fragmentation, first strand cDNA was synthesized using random primers followed by second-strand synthesis using DNA polymerase I. cDNA was ligated with index adapters for each sample followed by purification and enrichment by PCR to create the final library. The quality and quantity of the libraries were analyzed using the Agilent Bioanalyzer and Kapa Biosystems qPCR. Multiplexed libraries were pooled, and single-end 50 bp sequencing was performed on one flow-cell of an Illumina HiSeq 2500.

### **Lipid extraction and analysis**

Cell samples were re-suspended in 300 µL PBS and homogenized for 1 min using a disposable soft tissue homogenizer. Protein assays on individual homogenates were performed using a bicinchoninic acid (BCA) protein assay kit (Pierce, Rockford, IL). Lipid extraction from the remaining homogenate was performed using a modified Bligh and Dyer extraction procedure as described previously (Cheng *et al.*, 2006). A mixture of lipid internal standards was added prior to lipid extraction based on the total protein content of each sample.

Lipid extract was re-suspended into 400  $\mu\text{L}$  chloroform/methanol (1:1, v/v) per mg of protein and flushed with nitrogen, capped, and stored at  $-20^{\circ}\text{C}$  for mass spectrometry. A triple-quadrupole mass spectrometer (Thermo TSQ VANTAGE, San Jose, CA) equipped with a Nanomate device (TriVersaNanoMate, Advion Bioscience Ltd., Ithaca, NY) and Xcalibur system software was used as previously described [ref]. Lipid extracts were further diluted to a final concentration of  $\sim 500$  fmol/ $\mu\text{L}$  and then infused into the electrospray ionization source through an automated nanospray device. Typically, signals were averaged around 3 min periods in the profile mode for each full-scan MS spectrum, and 3 to 5 min periods of signal averaging in the profile mode were employed for each tandem mass spectrum. For tandem MS, the collision energy varied with the classes of lipids as described previously (Han and Gross, 2005), and the collision gas pressure was set at 1.0 mTorr. All the acquired MS data processing was conducted using a custom-programmed Microsoft Excel macro as previously described (Yang *et al.*, 2009), with due consideration of lipidomics principles (Wang *et al.*, 2016, Yang and Han, 2011).

### **Metabolomics analysis**

Metabolomics analysis was performed at the metabolomics core facility at SBP, Lake Nona. In brief, cell cultures containing equal numbers of cells were rinsed with PBS and liquid nitrogen  $\mu$  ( $\text{LN}_2$ ) was directly added to quench metabolism and efficiently lyse all cellular compartments. After boiling off the  $\text{LN}_2$ , the frozen material (slush) was quantitatively transferred using a cell lifter and razor blade into a 50 mL conical tube submerged in dry ice and delivered to the Metabolomics Core. Samples were thawed on ice, vortexed, and protein concentrations determined. For amino acids, acylcarnitine, and organic acid analyses, cell lysates were treated with acetonitrile/0.6% formic acid. Amino acids and acylcarnitines were extracted in methanol, and organic acids were extracted in ethyl acetate. All metabolites were derivatized prior to LC/MS/MS analysis. Authentic heavy isotope-labeled internal standards were used for quantitation purposes. Acetyl- and malonyl-CoA were extracted from cell lysate in 5% trichloroacetic acid. Samples were cleaned using solid-phase extraction prior to LC/MS/MS analysis.

### **Data analysis**

The raw reads (FASTQ files) were aligned to the reference genome using TopHat version v2.0.13 (Trapnell *et al.*, 2009) with RefSeq annotations and the “—no-novel-juncs” option. Ambiguous reads mapping to more than one genomic region and reads with MAPQ scores less than 10 were removed. The UCSC human genome version 38 (hg38) and the corresponding RefSeq annotations were used as reference and for mRNA transcript quantification. The annotation and coordinates of the lncRNAs from GenCode (Release 24, GRCh38) were applied for lncRNA transcript quantification. Transcript quantification was performed in Partek Genomics Suite (version 6.6, Partek Inc., St. Louis, MI) and the raw read counts and normalized read counts (RPKM: reads per kilobase per million mapped reads (Mortazavi *et al.*, 2008)) were obtained. The raw count information for all mRNA and lncRNA transcripts was filtered, with transcripts not presenting read counts in all samples filtered from further analysis. The remaining transcripts were analyzed with the BioConductor DESeq package (Anders and Huber, 2010) to detect differential expression between the conditions. Transcripts detected in at least one sample (RPKM $>1$ ), fold change over 2, and with p-values  $<0.05$  were considered as significant differential expression.

### **Supplementary Figures**

- Figure S1. Characterization of vitiligo melanocytes versus normal melanocytes.
- Figure S2. miR-211 and pigmentation genes in PIG1 and PIG3V cells.
- Figure S3. Confirmation of human vitiligo patient gene expression data (see main Table 2) by qPCR in HEM-I and PIG3V cells.
- Figure S4. miR-211 targets PGC1- $\alpha$  3'UTR locus.
- Figure S5. Analysis of putative miR-211 target genes in non-lesional, peri-lesional, and lesional areas of patients with vitiligo.
- Figure S6. Increased PGC1- $\alpha$  expression and reduced oxidative capacity in PIG3V cells compared to PIG1 cells.
- Figure S7. Defective NRF2 expression in PIG3V cells.
- Figure S8. Lipidomics analysis of HEM-I and PIG3V cells.

### **Supplementary Tables**

- Table S1a. Top twenty upregulated genes in PIG3V compared to HEM-I cells.
- Table S1b. Top twenty downregulated genes in PIG3V compared to HEM-I cells.
- Table S2. List of major pigmentation pathway genes downregulated in PIG3V cells compared to normal melanocytes.
- Table S3. Differential expression of genes involved in cell cycle progression in PIG3V and HEM-I cells.
- Table S4. Differential expression of genes involved in immune responses in PIG3V and HEM-I cells.
- Table S5. Changes in major mitochondrial energy metabolism pathway genes in PIG3V cells compared to HEM-I cells.
- Table S6. Shotgun lipidomics analysis in HEM-I and PIG3V cells.
- Table S7. List of qPCR primer sequences.

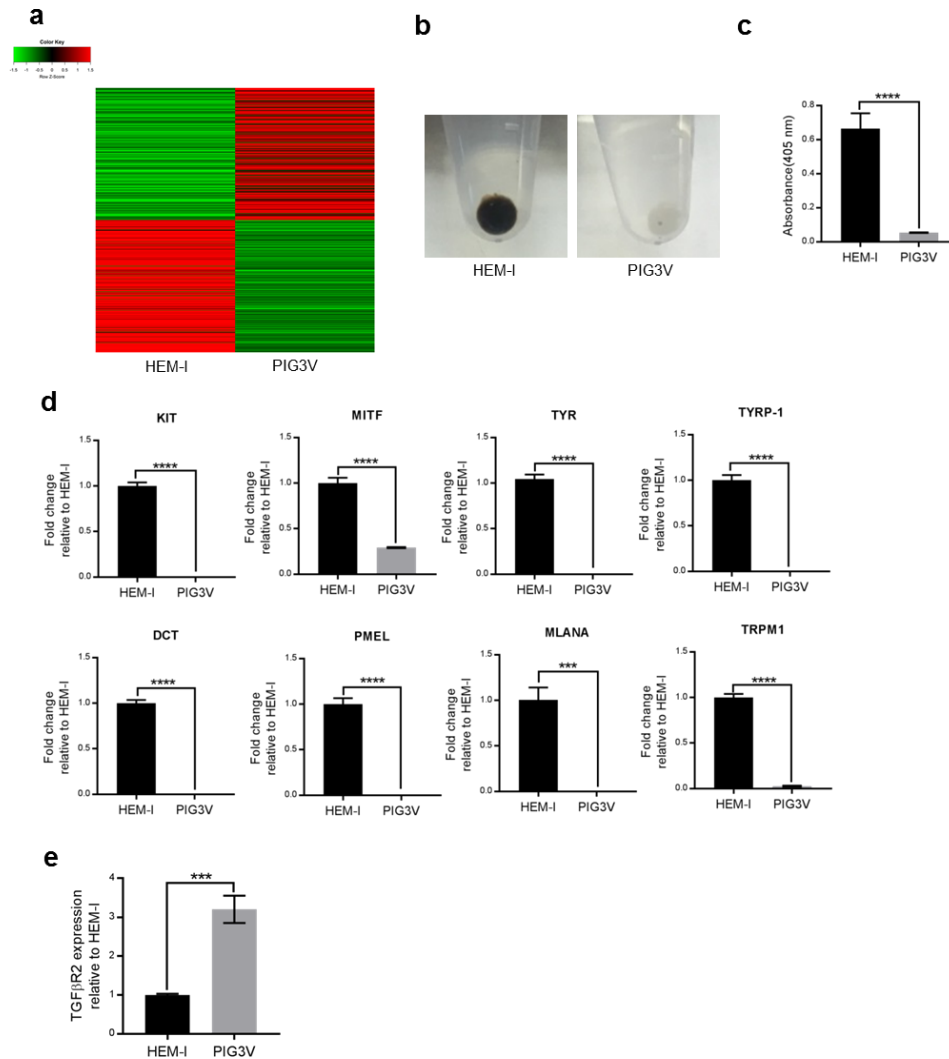

**Figure S1. Characterization of vitiligo melanocytes versus normal melanocytes (a)** Hierarchical clustering of primary melanocytes (HEM-I) and vitiligo (PIG3V) cells. **(b)** Cell pellets of HEM-I and PIG3V cells. **(c)** HEM-I and PIG3V cells were analyzed for melanin content. Graph depicts absorbance of dissolved pigments of each cell type at 405nm. **(d)** HEM-I and PIG3V cells were analyzed for expression of the indicated genes by quantitative RT-PCR. **(e)** HEM-I and PIG3V cells were analyzed for expression of *TGFβR2* by quantitative RT-PCR. Graphs in d and e show fold change in the indicated gene's expression compared to its expression in HEM-I cells. The Ct values were normalized by the expression of a reference gene *HPRT*. Results shown are mean  $\pm$  SDM and are representative of at least three independent experiments. Student's t-test was performed to detect between-group differences. P values: \*\*\*\*<0.0001

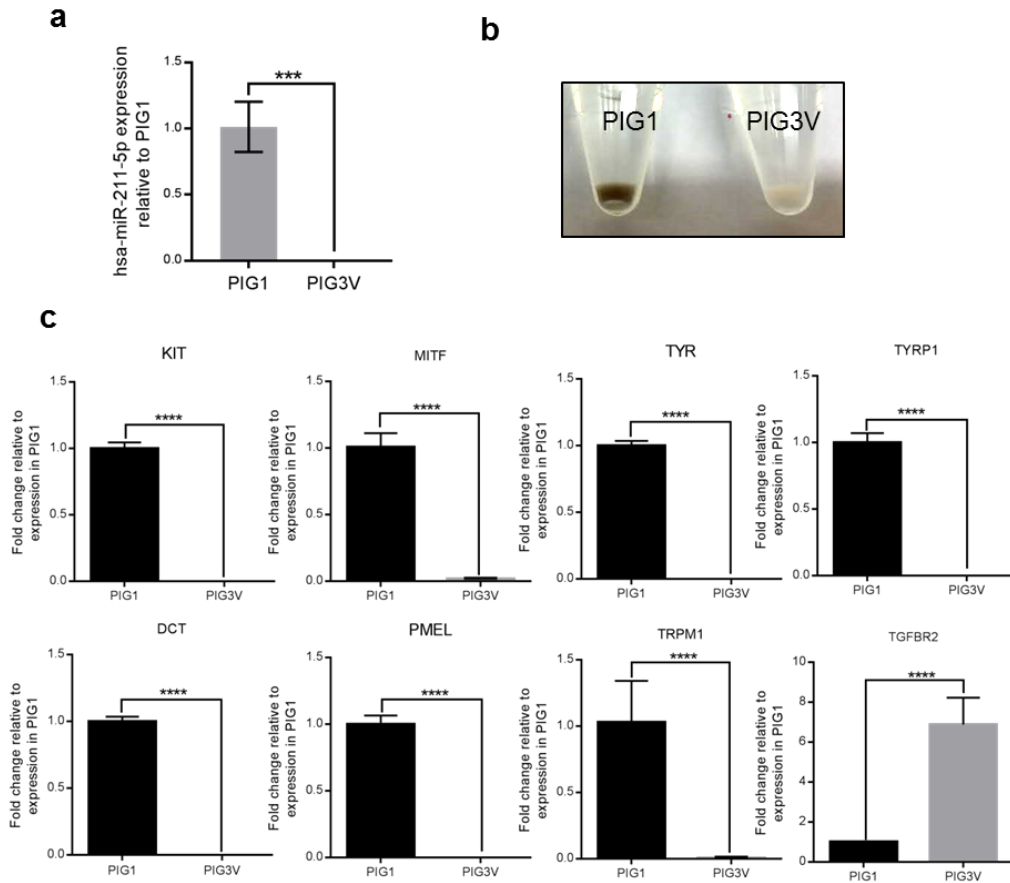

**Figure S2. miR-211 and pigmentation genes in PIG1 and PIG3V cells.** (a) PIG1 and PIG3V cells were analyzed for expression of hsa-miR-211 by quantitative RT-PCR. Graph shows fold change in miR-211 expression compared to its expression in PIG1 cells. (b) Cell pellets of PIG1 and PIG3V cells. (c) PIG1 and PIG3V cells were analyzed for expression of the indicated genes by quantitative RT-PCR. Graphs show fold change in the indicated gene's expression compared to its expression in PIG1 cells. The Ct values in (a) and (c) were normalized by the expression of a reference small non-coding RNA, *RNU48* and a reference gene *HPRT*, respectively. Results shown are mean  $\pm$  SDM and are representative of at least three independent experiments. Student's t-test was performed to detect between-group differences. P values: \*\*\* $<0.001$ ; \*\*\*\* $<0.0001$ .

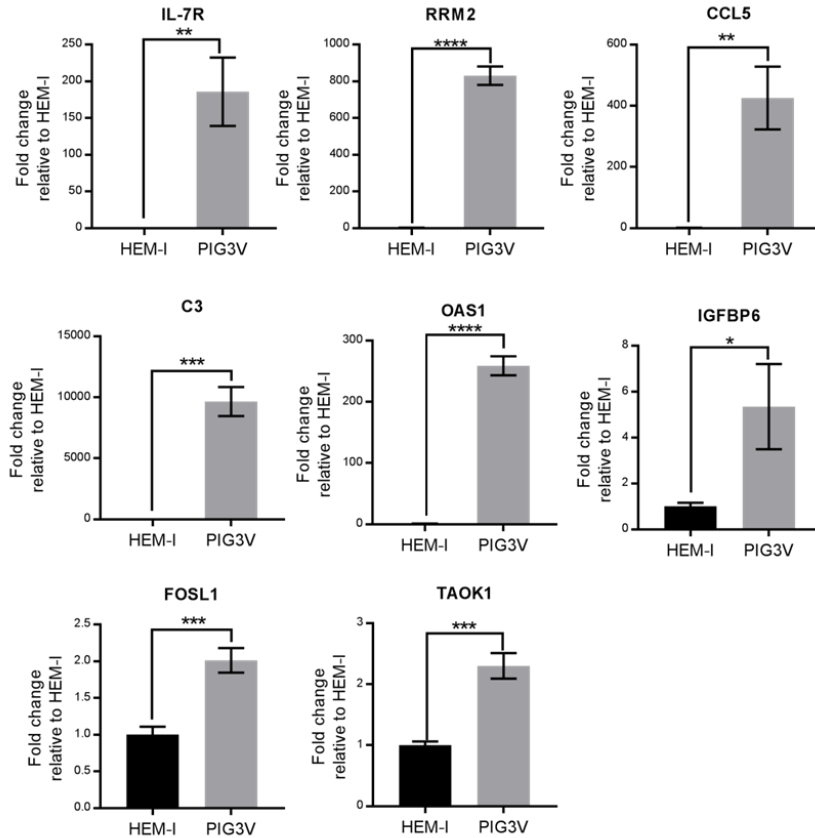

**Figure S3. Confirmation of human vitiligo patient gene expression data (see main Table 2) by qPCR in HEM-I and PIG3V cells.** HEM-I and PIG3V cells were analyzed for expression of the indicated genes by quantitative RT-PCR. Graphs show fold change in the indicated gene's expression compared to its expression in HEM-I cells. The Ct values were normalized by the expression of a reference gene *HPRT*. Results shown are mean  $\pm$  SDM and are representative of at least three independent experiments. Student's t-test was performed to detect between-group differences. P values: \* $<0.05$ ; \*\* $<0.01$ ; \*\*\* $<0.001$ ; \*\*\*\* $<0.0001$



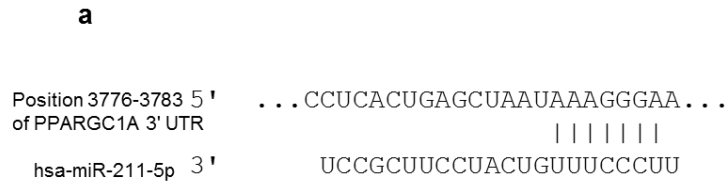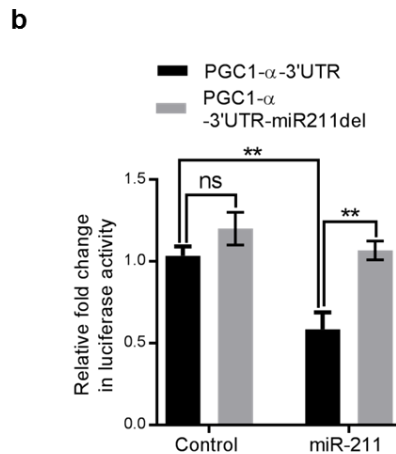

**Figure S4. miR-211 targets PGC1- $\alpha$  3'UTR locus.** (a) Predicted miR-211 binding site at the PGC1- $\alpha$  3'UTR locus in TargetScan (human PPARGC1A ENST00000264867.2 3' UTR length: 3801bp) (b) HEK293 cells were transfected with luciferase expression vectors (pcDNA6-Luc) containing either the PGC1- $\alpha$ -3'UTR or PGC1- $\alpha$ -3'UTR-miR211-del (miR-211 binding site deleted) with vector only or miR-211 expression vector. 48 h post transfection, cells were analyzed for luciferase activity. Graph shows relative fold change in luciferase activity compared to HEK293 cells transfected with PGC1- $\alpha$ -3'UTR containing luciferase expression plasmid. All transfections were performed in triplicates and normalized with co-transfected Renilla luciferase plasmids. Results shown in (b) are mean  $\pm$  SDM and representative of at least three independent experiments. Student's t-test was performed to detect between-group differences. P values: \*\*<0.01

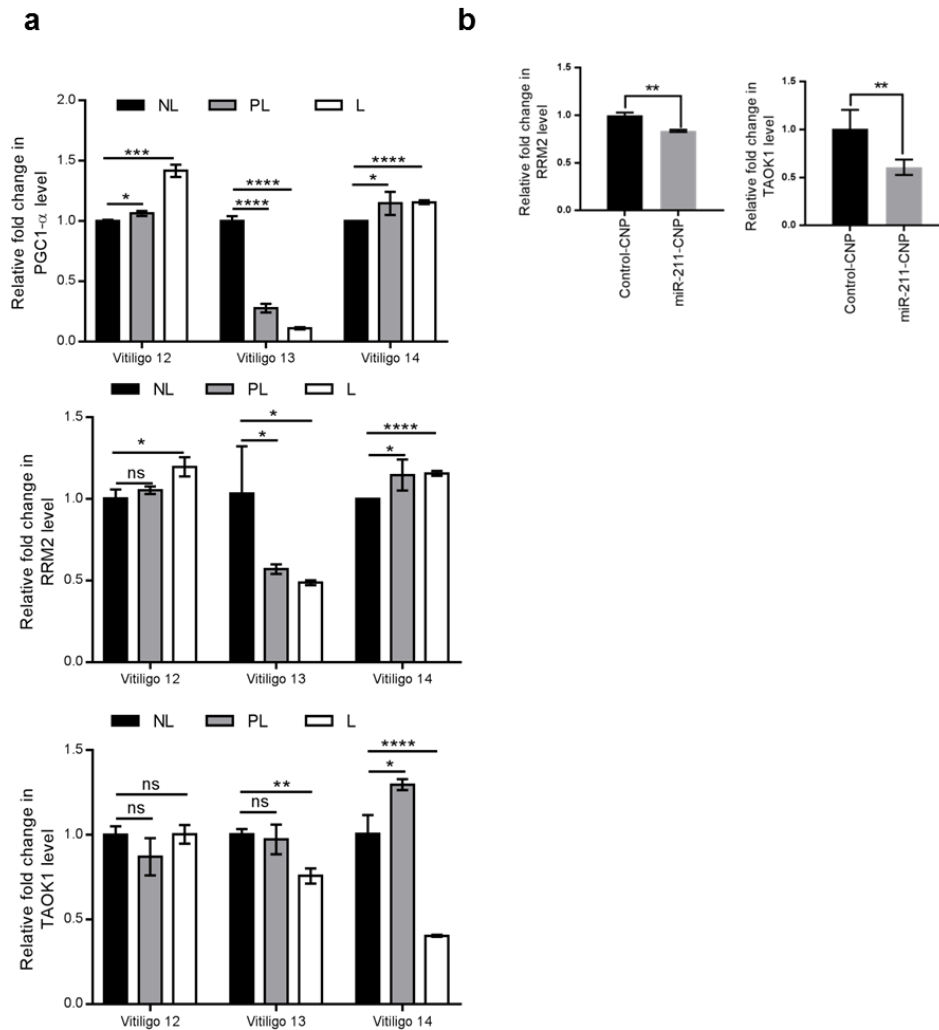

**Figure S5. Analysis of putative miR-211 target genes in non-lesional, peri-lesional, and lesional areas of patients with vitiligo.** (a) Total RNA from non-lesional (NL), peri-lesional (PL), and lesional (L) regions from three patients with vitiligo was analyzed for the expression of indicated genes (*PPARGCIA*, *RRM2*, and *TAOK1*) by quantitative RT-PCR. Graph shows fold change in indicated gene expression in each patient compared to its expression in the corresponding NL region. The Ct values were normalized to the average expression of four reference genes (*GAPDH*, *ACTB*, *HPRT*, and *TBP*). Results shown are mean  $\pm$  SDM. (b) PIG3V cells were treated with either miR-211-CNP or control CNP. 24 h post treatment, cells were analyzed for indicated gene expression. The Ct values were normalized by the expression of reference gene *HPRT*. Data are depicted as fold changes in gene expression compared to their expression in untreated PIG3V cells alone. Results shown in (b) are mean  $\pm$  SDM and representative of at least three independent experiments. Student's t-test was performed to detect significant differences as indicated. P values: \* $<0.05$ ; \*\* $<0.01$ ; \*\*\* $<0.001$ ; \*\*\*\* $<0.0001$

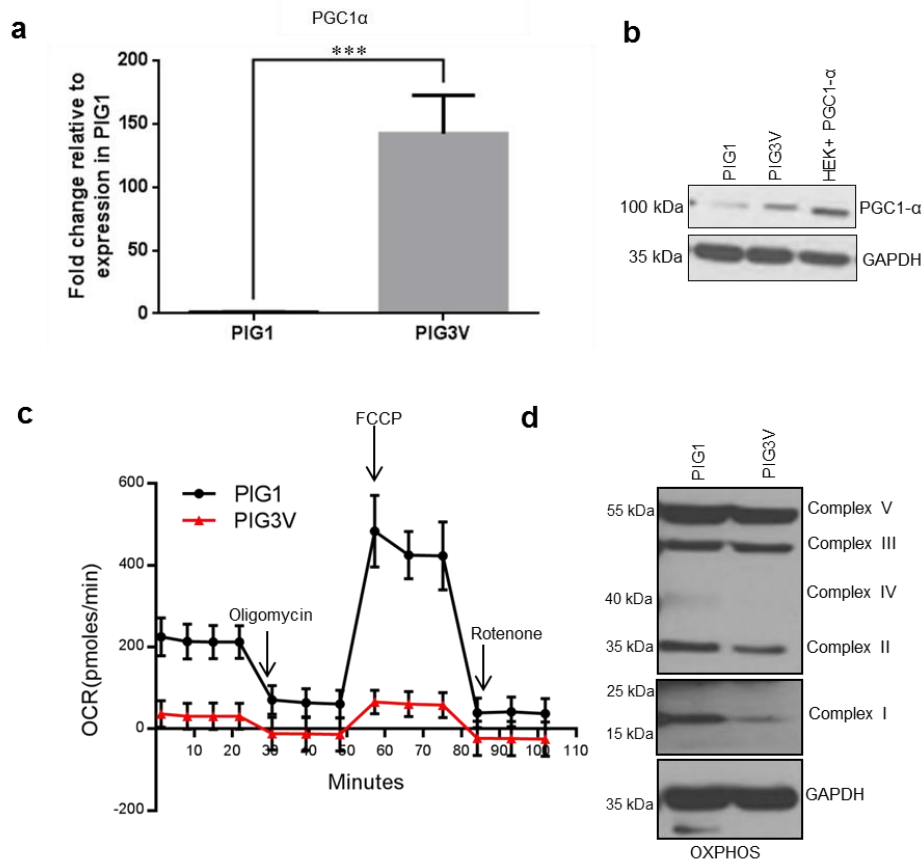

**Figure S6. Increased PGC1- $\alpha$  expression and reduced oxidative capacity in PIG3V cells compared to PIG1 cells.** (a-b) PIG1 and PIG3V cells were analyzed for PGC1- $\alpha$  expression by quantitative RT-PCR (a) and western blot analysis (b). The Ct values in (a) were normalized by the expression of a reference gene *HPRT* and are depicted as a fold change in PGC1- $\alpha$  expression compared to its expression in PIG1 cells. Student's t-test was performed to detect significant differences as indicated. P values \*\*\*<0.001 (c) Oxygen consumption rate (OCR) and extracellular acidification rate (ECAR) were analyzed using the Seahorse XF analyzer in PIG1 and PIG3V cells. OCR and ECAR were measured in untreated cells followed by treatment with oligomycin (2 $\mu$ M) and follow-up treatment with FCCP (1 $\mu$ M) and finally rotenone/antimycin A (1 $\mu$ M) cocktail. Each sample was measured in 10 wells per treatment. The assay was performed in triplicate. (d) PIG1 and PIG3V cell lysates were analyzed for the expression of the indicated mitochondrial complex subunits by western blot analysis. GAPDH was used as a loading control. Results shown are representative of at least three independent experiments

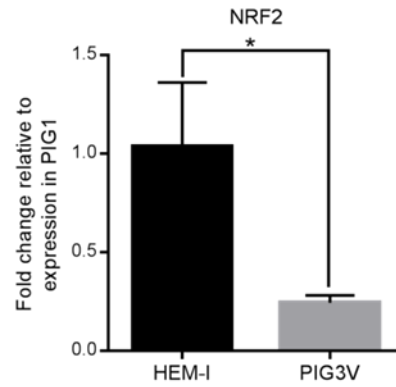

**Figure S7. Defective *NRF2* expression in PIG3V cells.** HEM-1 and PIG3V cells were analyzed for expression of *NRF2* by quantitative RT-PCR. Graphs show fold changes in expression compared to HEM-1 cells. Results shown are mean  $\pm$  SDM and representative of at least three independent experiments. Student's t-test was performed to detect significant differences. P value: \* $<0.05$

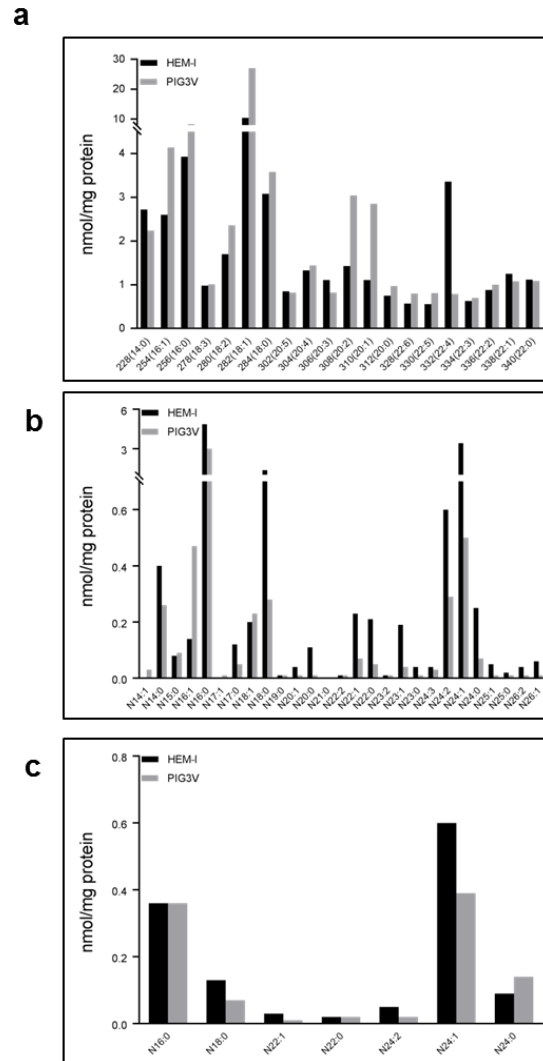

**Figure S8. Lipidomics analysis of HEM-I and PIG3V cells. (a-c)** Graphs depict changes in fatty acid chains for different lipid families

**Table S1a.** Top twenty upregulated genes in PIG3V compared to HEM-1 cells.

| <b>Gene</b>     | <b>Gene Description</b>                                | <b>Log2FC<br/>(PIG3V/HEM-1)</b> | <b>p-value</b> |
|-----------------|--------------------------------------------------------|---------------------------------|----------------|
| <i>AKR1C3</i>   | aldo-keto reductase family 1, member C3                | 11.1                            | <0.0001        |
| <i>TOP2A</i>    | topoisomerase (DNA) II alpha                           | 10.7                            | <0.0001        |
| <i>THBS1</i>    | thrombospondin 1                                       | 9.3                             | <0.0001        |
| <i>FN1</i>      | fibronectin 1                                          | 8.0                             | 0.0001         |
| <i>CENPF</i>    | centromere protein F                                   | 8.0                             | <0.0001        |
| <i>FBN2</i>     | fibrillin 2                                            | 6.6                             | <0.0001        |
| <i>ATAD2</i>    | ATPase family, AAA domain containing 2                 | 6.2                             | <0.0001        |
| <i>HSP90B1</i>  | heat shock protein 90kDa beta family member 1          | 4.6                             | <0.0001        |
| <i>TPR</i>      | translocated promoter region, nuclear basket protein   | 4.6                             | <0.0001        |
| <i>LAMB1</i>    | laminin subunit beta 1                                 | 4.2                             | <0.0001        |
| <i>DEK</i>      | DEK proto-oncogene                                     | 3.7                             | <0.0001        |
| <i>PRKDC</i>    | protein kinase, DNA-activated, catalytic polypeptide   | 3.7                             | 0.0001         |
| <i>HSP90AA1</i> | heat shock protein 90kDa alpha family class A member 1 | 3.4                             | 0.0004         |
| <i>UTRN</i>     | utrophin                                               | 3.0                             | <0.0001        |
| <i>MYH9</i>     | myosin, heavy chain 9, non-muscle                      | 2.6                             | 0.0075         |
| <i>PPARGC1A</i> | PPARG coactivator 1 alpha                              | 2.4                             | 0.0004         |
| <i>FADS1</i>    | fatty acid desaturase 1                                | 2.4                             | 0.0036         |
| <i>CANX</i>     | calnexin                                               | 2.2                             | 0.0093         |
| <i>MCM3</i>     | minichromosome maintenance complex component 3         | 2.0                             | 0.0003         |
| <i>MCAM</i>     | melanoma cell adhesion molecule                        | 1.9                             | 0.0015         |

**Table S1b.** Top twenty downregulated genes in PIG3V compared to HEM-1 cells.

| <b>Gene</b>     | <b>Gene Description</b>                                             | <b>Log2FC<br/>(PIG3V/HEM-1)</b> | <b>p-value</b> |
|-----------------|---------------------------------------------------------------------|---------------------------------|----------------|
| <i>TYR</i>      | tyrosinase                                                          | -18.7                           | <0.0001        |
| <i>PMEL</i>     | premelanosome protein                                               | -13.2                           | <0.0001        |
| <i>DCT</i>      | dopachrome tautomerase                                              | -11.1                           | <0.0001        |
| <i>TYRP1</i>    | tyrosinase related protein 1                                        | -10.4                           | <0.0001        |
| <i>TRPM1</i>    | transient receptor potential cation channel subfamily M member 1    | -9.6                            | <0.0001        |
| <i>PSAP</i>     | prosaposin                                                          | -5.1                            | <0.0001        |
| <i>IGFBP7</i>   | insulin like growth factor binding protein 7                        | -3.4                            | 0.0005         |
| <i>SCARNA10</i> | small Cajal body-specific RNA 10                                    | -3.4                            | <0.0001        |
| <i>ATP1A1</i>   | ATPase Na <sup>+</sup> /K <sup>+</sup> transporting subunit alpha 1 | -3.1                            | 0.0001         |
| <i>FTL</i>      | ferritin, light polypeptide                                         | -2.9                            | 0.0037         |
| <i>SAT1</i>     | spermidine/spermine N1-acetyltransferase 1                          | -2.9                            | <0.0001        |
| <i>CD63</i>     | CD63 molecule                                                       | -2.8                            | 0.0004         |
| <i>LMNA</i>     | lamin A/C                                                           | -2.6                            | 0.0001         |
| <i>PSAP</i>     | prosaposin                                                          | -2.6                            | 0.0080         |
| <i>FSTL1</i>    | follistatin like 1                                                  | -2.5                            | 0.0021         |
| <i>LGALS1</i>   | galectin 1                                                          | -2.3                            | 0.0026         |
| <i>BSG</i>      | basigin (Ok blood group)                                            | -2.3                            | 0.0021         |
| <i>FAT1</i>     | FAT atypical cadherin 1                                             | -2.0                            | <0.0001        |
| <i>QPRT</i>     | quinolinate phosphoribosyl transferase                              | -2.0                            | 0.0001         |
| <i>DDB1</i>     | damage specific DNA binding protein 1                               | -2.0                            | 0.0054         |

**Table S2.** List of major pigmentation pathway genes downregulated in PIG3V cells compared to normal melanocytes

| <b>Gene</b> | <b>Gene description</b>                         | <b>Log2FC<br/>(PIG3V/HEM-1)</b> | <b>p-value</b> |
|-------------|-------------------------------------------------|---------------------------------|----------------|
| TYR         | Tyrosinase                                      | -18.7                           | <0.0001        |
| PMEL        | premelanosome protein                           | -13.2                           | <0.0001        |
| DCT         | Dopachrome tautomerase                          | -11.1                           | <0.0001        |
| MLANA       | Melan-A                                         | -10.9                           | <0.0001        |
| c-KIT       | KIT proto-oncogene receptor tyrosine kinase     | -10.5                           | <0.0001        |
| TYRP1       | Tyrosinase related protein 1                    | -10.4                           | <0.0001        |
| MITF        | Microphthalmia -associated transcription factor | -6.1                            | <0.0001        |
| PAX3        | Paired box 3                                    | -3.7                            | <0.0001        |



**Table S3.** Differential expression of genes involved in cell cycle progression in PIG3V and HEM-1 cells

| <b>Gene</b>    | <b>Gene Description</b>                        | <b>Log2FC<br/>(PIG3V/HEM-1)</b> | <b>p-value</b> |
|----------------|------------------------------------------------|---------------------------------|----------------|
| <i>CHEK1</i>   | cell cycle checkpoint kinase                   | 6.8                             | <0.0001        |
| <i>KNTC1</i>   | kinetochore associated 1                       | 3.6                             | <0.0001        |
| <i>MCM4</i>    | minichromosome maintenance complex component 4 | 3.2                             | <0.0001        |
| <i>CDK6</i>    | cyclin-dependent kinase 6                      | 3.1                             | <0.0001        |
| <i>CUL3</i>    | cullin 3                                       | 2.9                             | <0.0001        |
| <i>RBBP8</i>   | retinoblastoma binding protein 8               | 2.8                             | <0.0001        |
| <i>CDKN2B</i>  | cyclin-dependent kinase inhibitor 2B           | 2.7                             | <0.0001        |
| <i>HPRT1</i>   | hypoxanthine phosphoribosyl transferase 1      | 2.6                             | <0.0001        |
| <i>MCM3</i>    | minichromosome maintenance complex component 3 | 2.3                             | 0.0001         |
| <i>CKS1B</i>   | CDC28 protein kinase regulatory subunit 1B     | 2.1                             | 0.0206         |
| <i>MCM2</i>    | minichromosome maintenance complex component 2 | 2.0                             | 0.0001         |
| <i>ATM</i>     | ataxia telangiectasia mutated                  | 1.6                             | 0.0031         |
| <i>CCNH</i>    | cyclin H                                       | 1.6                             | 0.0021         |
| <i>TFDP1</i>   | transcription factor Dp-1                      | 1.4                             | 0.0024         |
| <i>PCNA</i>    | proliferating cell nuclear antigen             | 1.0                             | 0.0251         |
| <i>CDC16</i>   | cell division cycle 16                         | -1.6                            | 0.0007         |
| <i>SERTAD1</i> | SERTA domain containing 1                      | -1.8                            | 0.0004         |
| <i>CDKN1B</i>  | cyclin-dependent kinase inhibitor 1B           | -2.5                            | <0.0001        |
| <i>DNM2</i>    | dynamamin 2                                    | -2.5                            | <0.0001        |
| <i>CDK2</i>    | cyclin-dependent kinase 2                      | -4.1                            | <0.0001        |

**Table S4.** Differential expression of genes involved in immune responses in PIG3V and HEM-1 cells

| <b>Gene</b> | <b>Gene Description</b>                     | <b>Log2FC<br/>(PIG3V/HEM-1)</b> | <b>p-value</b> |
|-------------|---------------------------------------------|---------------------------------|----------------|
| IL7R        | interleukin 7 receptor                      | 15.2                            | <0.0001        |
| TNFSF10     | tumor necrosis factor superfamily member 10 | 13.0                            | <0.0001        |
| PTGER2      | prostaglandin E receptor 2                  | 12.5                            | <0.0001        |
| HDAC9       | histone deacetylase 9                       | 9.4                             | <0.0001        |
| NFATC1      | nuclear factor of activated T-cells 1       | 9.0                             | <0.0001        |
| CSF1        | colony stimulating factor 1                 | 8.6                             | <0.0001        |
| CD70        | CD70 molecule                               | 8.6                             | 0.0001         |
| FOXP2       | forkhead box P2                             | 8.3                             | 0.0002         |
| ITGA1       | integrin subunit alpha 1                    | 8.3                             | <0.0001        |
| HDAC9       | histone deacetylase 9                       | 7.7                             | 0.0010         |
| CSF1        | colony stimulating factor 1                 | 5.5                             | <0.0001        |
| TGFB1       | transforming growth factor beta 1           | 4.6                             | <0.0001        |
| IL6         | interleukin 6                               | 3.7                             | 0.0003         |
| FOXP1       | forkhead box P1                             | 3.6                             | 0.0068         |
| IL15        | interleukin 15                              | 3.3                             | 0.0021         |
| HPRT1       | hypoxanthine phosphoribosyltransferase 1    | 2.6                             | <0.0001        |
| DGKA        | diacylglycerol kinase alpha                 | 2.6                             | 0.0834         |
| ITCH        | itchy E3 ubiquitin protein ligase           | 2.3                             | <0.0001        |
| MEF2A       | myocyte enhancer factor 2A                  | 1.9                             | 0.0670         |
| GAPDH       | glyceraldehyde-3-phosphate dehydrogenase    | 1.8                             | 0.0021         |
| ICAM1       | intercellular adhesion molecule 1           | 1.6                             | 0.0006         |
| CBLB        | Cbl proto-oncogene B                        | 1.6                             | 0.0010         |

| <b>Gene</b> | <b>Gene Description</b>                               | <b>Log2FC<br/>(PIG3V/HEM-1)</b> | <b>p-value</b> |
|-------------|-------------------------------------------------------|---------------------------------|----------------|
| FOS         | Fos proto-oncogene, AP-1 transcription factor subunit | -1.2                            | 0.0162         |
| STAT6       | signal transducer and activator of transcription 6    | -1.2                            | 0.0095         |
| NFKB1       | nuclear factor kappa B subunit 1                      | -1.3                            | 0.0161         |
| CDK4        | cyclin-dependent kinase 4                             | -1.3                            | 0.0084         |
| ING4        | inhibitor of growth family member 4                   | -2.2                            | 0.0111         |
| CD40        | CD40 molecule                                         | -2.2                            | 0.1880         |
| NOTCH1      | notch 1                                               | -2.4                            | 0.0000         |
| CDK2        | cyclin-dependent kinase 2                             | -2.4                            | 0.0002         |
| LGALS3      | lectin, galactoside binding soluble 3                 | -2.8                            | <0.0001        |
| TNFRSF14    | tumor necrosis factor receptor superfamily member 14  | -4.8                            | <0.0001        |
| EOMES       | eomesodermin                                          | -5.0                            | <0.0001        |
| IRF4        | interferon regulatory factor 4                        | -7.6                            | <0.0001        |
| RNF128      | ring finger protein 128, E3 ubiquitin protein ligase  | -8.7                            | <0.0001        |

**Table S5.** Changes in major mitochondrial energy metabolism pathway genes in PIG3V cells compared to HEM-1 cells

| <b>Mitochondrial Complex</b>                           | <b>Gene</b>                               | <b>Gene Description</b>                           | <b>Log2FC (PIG3V/HEM-1)</b> | <b>p-value</b> |
|--------------------------------------------------------|-------------------------------------------|---------------------------------------------------|-----------------------------|----------------|
| <b>Complex I<br/>(NADH-Coenzyme Q reductase)</b>       | NDUFC1                                    | NADH:ubiquinone oxidoreductase subunit C1         | -4.1                        | 0.0006         |
|                                                        | NDUFS7                                    | NADH:ubiquinone oxidoreductase core subunit S7    | -2.0                        | <0.0001        |
|                                                        | NDUFB2                                    | NADH:ubiquinone oxidoreductase subunit B2         | -1.6                        | 0.0002         |
|                                                        | NDUFB7                                    | NADH:ubiquinone oxidoreductase subunit B7         | -1.5                        | 0.0004         |
|                                                        | NDUFB4                                    | NADH:ubiquinone oxidoreductase subunit B4         | -1.5                        | 0.0013         |
|                                                        | NDUFB8                                    | NADH:ubiquinone oxidoreductase subunit B8         | -1.4                        | 0.0396         |
|                                                        | NDUFA11                                   | NADH:ubiquinone oxidoreductase subunit A11        | -1.3                        | 0.0046         |
|                                                        | NDUFS3                                    | NADH:ubiquinone oxidoreductase core subunit S3    | -1.2                        | 0.0028         |
|                                                        | NDUFA4                                    | NDUFA4, mitochondrial complex associated          | -1.2                        | 0.0215         |
|                                                        | NDUFV1                                    | NADH:ubiquinone oxidoreductase core subunit V1    | -1.2                        | 0.0099         |
| NDUFA5                                                 | NADH:ubiquinone oxidoreductase subunit A5 | 1.2                                               | 0.0322                      |                |
| <b>Complex II<br/>(Succinate-Coenzyme Q reductase)</b> | SDHAF2                                    | succinate dehydrogenase complex assembly factor 1 | -1.1                        | 0.0085         |
|                                                        | SDHC                                      | succinate dehydrogenase complex subunit C         | -0.9                        | 0.0330         |
| <b>Complex IV<br/>(Cytochrome c oxidase)</b>           | COX6A1                                    | cytochrome c oxidase subunit 6A1                  | -1.8                        | 0.0006         |
|                                                        | COX8A                                     | cytochrome c oxidase subunit 8A                   | -1.4                        | 0.0035         |

**Table S6** Shotgun lipidomics analysis in HEM-1 and PIG3V cells.

| <b>Name</b>                   | <b>HEM-1</b> | <b>PIG3V</b> |
|-------------------------------|--------------|--------------|
| Phosphatidylethanolamine(PE)  | 50.6         | 55.6         |
| Ceramide (CER)                | 1.3          | 1.0          |
| Phosphatidylinositol (PI)     | 10.0         | 8.8          |
| Cardiolipin (CL)              | 0.3          | 3.7          |
| Phosphatidylserine (PS)       | 18.8         | 9.0          |
| Phosphatidylglycerol (PG)     | 1.7          | 5.3          |
| Phosphatidic acid (PA)        | 1.3          | 0.3          |
| Sphingomyelin (SM)            | 12.5         | 5.6          |
| Phosphatidylcholine (PC)      | 27.0         | 53.4         |
| Lyso Phosphatidylcholine(LPC) | 0.6          | 1.1          |
| Acyl Carnitine (CAR)          | 19.5         | 21.8         |
| Diacylglycerol (DAG)          | 6.4          | 2.6          |
| Triacylglycerol (TAG)         | 11.3         | 21.7         |
| Fatty Acyl Chains in TAG (FA) | 40.4         | 65.0         |

**Table S7.** List of qPCR primer sequences

| <b>Gene</b> | <b>Sequence</b>          |
|-------------|--------------------------|
| KIT-F       | CGTGGAAAAGAGAAAACAGTCA   |
| KIT-R       | CACCGTGATGCCAGCTATTA     |
| MITF-F      | AAGGTCTGCCCCACCAGGC      |
| MITF-R      | TTGGCCAGTGCTCTTGCTTCAGAC |
| TYR -F      | CCTAACTTACTCAGCCCAGCA    |
| TYR -R      | TGTTGTACTCCTCCAATCGGC    |
| TYRP-1-F    | CTTTTCTCACATGGCACAGG     |
| TYRP-1-R    | AAGGCTCTTGCAACATTTCC     |
| DCT - F     | CCTCAGACCAACTTGGCTACA    |
| DCT - R     | GGCCAACCTGGAGTTTCTTC     |
| PMEL-F      | TCTTGCTGGTGTGATGGCT      |
| PMEL-R      | GGGGTACGGAGAAGTCTTGC     |
| MLANA-F     | CTGCTCATCGGCTGTTGGTA     |
| MLANA-R     | GAGCATTGGGAACCACAGGT     |
| TRPM-1-F    | ACGACGGAATGGCAATGCCAA    |
| TRPM-1-R    | AGGAATTGCTTCAGCGACATGGTG |
| NRF2-F      | AGACGGTATGCAACAGGACA     |
| NRF2-R      | GGCTTCTGGACTTGGAAACCAT   |
| GPX1 E1- F  | ACACCCAGATGAACGAGCTG     |
| GPX1 E2 - R | GCCGGACGTACTIONTGAGGGAA  |
| TGFBR2 - R  | CCAGCACTCAGTCAACGTCT     |
| PPARGC1A -F | ACTTTTGTGGACGCAAGCAA     |
| PPARGC1A -R | GGTGAAGCAGGGTCAAAGT      |
| IL-7R-F     | ATAATAGCTCAGGGGAGATGGA   |
| IL-7R-R     | ACTGGGCCATACGATAGGCT     |
| RRM2-F      | ACAAGGAGAACACGCCGC       |
| RRM2-R      | GGGGGCAGCTGCTTTAGTTT     |
| CCL5-F      | AGCAGTCGTCCACAGGTCAA     |
| CCL5-R      | CTTCTCTGGGTTGGCACACA     |
| C3-F        | TGTGAGCCAGGAGTGGACTA     |
| C3-R        | ATCCGAGCCTGACTTGATGG     |
| OAS1-F      | GTCGAAGGCCTTGTGAACAG     |
| OAS1-R      | CAGTTTGTCAGTCTCCGCCT     |
| IGFBP6-F    | CCTGCTGTTGCAGAGGAGAAT    |
| IGFBP6-R    | GTCTTGGACACCCGCAGAAT     |
| FOSL1-F     | GTCGAAGGCCTTGTGAACAG     |
| FOSL1-R     | CAGTTTGTCAGTCTCCGCCT     |
| TAOK1-F     | CCTCCTCCTCCTCACTCCTC     |
| TAOK1-R     | GGCATAAACTACCTTTTCGCCG   |
| HPRT1-F     | TGGGACTCTGTAGGGACCAG     |
| HPRT1 - R   | GTGATTCAGCCCCAGTCCAT     |

## REFERENCES

- Anders S, Huber W. Differential expression analysis for sequence count data. *Genome Biol* 2010;11:R106.
- Cheng H, Guan S, Han X. Abundance of triacylglycerols in ganglia and their depletion in diabetic mice: implications for the role of altered triacylglycerols in diabetic neuropathy. *Journal of neurochemistry* 2006;97:1288-300.
- Das S, Singh S, Dowding JM, Oommen S, Kumar A, Sayle TXT, et al. The induction of angiogenesis by cerium oxide nanoparticles through the modulation of oxygen in intracellular environments. *Biomaterials* 2012;33:7746-55.
- Han X, Gross RW. Shotgun lipidomics: multidimensional MS analysis of cellular lipidomes. *Expert review of proteomics* 2005;2:253-64.
- Mazar J, DeYoung K, Khaitan D, Meister E, Almodovar A, Goydos J, et al. The regulation of miRNA-211 expression and its role in melanoma cell invasiveness. *PloS one* 2010;5:e13779.
- Mazar J, Qi F, Lee B, Marchica J, Govindarajan S, Shelley J, et al. MicroRNA 211 Functions as a Metabolic Switch in Human Melanoma Cells. *Molecular and Cellular Biology* 2016;36:1090-108.
- Mortazavi A, Williams BA, McCue K, Schaeffer L, Wold B. Mapping and quantifying mammalian transcriptomes by RNA-Seq. *Nat Methods* 2008;5:621-8.
- Trapnell C, Pachter L, Salzberg SL. TopHat: discovering splice junctions with RNA-Seq. *Bioinformatics* 2009;25:1105-11.
- Wang M, Wang C, Han X. Selection of internal standards for accurate quantification of complex lipid species in biological extracts by electrospray ionization mass spectrometry—What, how and why? *Mass Spectrometry Reviews* 2016:n/a-n/a.
- Yang K, Cheng H, Gross RW, Han X. Automated lipid identification and quantification by multidimensional mass spectrometry-based shotgun lipidomics. *Analytical chemistry* 2009;81:4356-68.
- Yang K, Han X. Accurate Quantification of Lipid Species by Electrospray Ionization Mass Spectrometry — Meets a Key Challenge in Lipidomics. *Metabolites* 2011;1:21.
